# Supplementary material
Source: PubMed Central journal article supplement (PMC3210389)
Supplement: NIHMS327868-supplement-01.pdf [file NIHMS327868-supplement-01.pdf]

**Supplementary Table 1.** Stary classification of atherosclerotic lesion stages

| <b>Stary Stages</b> | <b>Histological Manifestation</b>                                                |
|---------------------|----------------------------------------------------------------------------------|
| <b>Type I</b>       | Accumulations of smooth muscle cells in the absence of macrophage foam cells     |
| <b>Type II</b>      | Lesions containing foam cell layers without a necrotic core or fibrous cap       |
| <b>Type III</b>     | Lesions with extracellular lipid pools based on type II lesions                  |
| <b>Type IV</b>      | Lesions containing well-formed extracellular lipid core                          |
| <b>Type V</b>       | Lesions with fibromuscular layers overlaying lipid core (fibrous cap)            |
| <b>Type VI</b>      | Lesions with surface defect, hematoma or thrombosis (ruptured thin fibrous cap ) |
| <b>Type VII</b>     | Lesions with well-formed calcification nodule                                    |
| <b>Type VIII</b>    | Lesions containing collagen-rich plaque with large contents of calcification     |

**Supplementary Table 2.** Comparison of simulated parameters in the 3 equivalent circuit models for endoluminal EIS data in Figure 1d

| Equivalent Circuit | $Y_1/C_{DL1}$<br>( $10^{-8}F$ ) | $a_1$ | $R_{CT1}$<br>( $\Omega$ ) | $R_B$<br>( $10^3\Omega$ ) | $C_B$<br>( $10^{-11}F$ ) | $Y_2/C_{DL2}$<br>( $10^{-8}F$ ) | $a_2$ | $R_{CT2}$<br>(Ohm)<br>( $10^{-4}$ ) | Goodness of Fit<br>( $10^{-4}$ ) |
|--------------------|---------------------------------|-------|---------------------------|---------------------------|--------------------------|---------------------------------|-------|-------------------------------------|----------------------------------|
| <b>EC1</b>         | 4.61                            | 0.68  | $>1.0 \times 10^{38}$ *   | 6.72                      | 5.70                     | 6.16                            | 0.85  | 1.74                                | 6.5                              |
| <b>EC2</b>         | 4.78                            | 0.68  | N/A                       | 6.67                      | 5.74                     | 2.37                            | N/A   | 9.94                                | 6.8                              |
| <b>EC3</b>         | 0.614                           | N/A   | N/A                       | 9.33                      | 6.17                     | 0.222                           | N/A   | 6.34                                | 220                              |

\*: Simulated value exceeded computational capacity of the simulation software, indicating a large charge transfer resistance of the counter electrode ( $R_{CT1}$ ).

N/A : Not Applicable
